# Supplementary material for: Capacity-prediction models for organic anode-active materials of lithium-ion batteries: advances in predictors using small data
Source: Royal Society of Chemistry journal article supplement (doi:10.1039/d3ya00161j), 2023-01-01
Supplement: d3ya00161j1.pdf [file d3ya00161j1.pdf]

## Electronic Supplementary Information (ESI)

### Capacity-prediction models for organic anode active materials of lithium-ion battery: Advances in the predictors using small data

Haruka Tobita,<sup>a</sup> Yuki Namiuchi,<sup>b</sup> Takumi Komura,<sup>a</sup> Hiroaki Imai,<sup>a</sup> Koki Obinata,<sup>c</sup> Masato Okada,<sup>c</sup> Yasuhiko Igarashi,<sup>\*,b</sup> Yuya Oaki<sup>\*,a</sup>

<sup>a</sup>Department of Applied Chemistry, Faculty of Science and Technology, Keio University, 3-14-1 Hiyoshi, Kohoku-ku, Yokohama 223-8522, Japan

<sup>b</sup> Faculty of Engineering, Information and Systems, University of Tsukuba, 1-1-1 Tennodai, Tsukuba 305-8573, Japan

<sup>c</sup> Graduate School of Frontier Sciences, The University of Tokyo, 5-1-5 Kashiwanoha, Kashiwa 277-8561, Japan

E-mail: oakiyuya@applc.keio.ac.jp

## Contents

|                                                                     |        |
|---------------------------------------------------------------------|--------|
| Experimental methods                                                | P. S2  |
| Molecular structures of <b>1–54</b> for training data (Scheme S1)   | P. S3  |
| Molecular structures of <b>A–M</b> for test data (Scheme S2)        | P. S5  |
| Charge-discharge measurements of the additional compounds (Fig. S1) | P. S6  |
| Training and test datasets G1 (Tables S1 and S2)                    | P. S7  |
| Training and test datasets G2 (Tables S3 and S4)                    | P. S9  |
| Training and test datasets G3 (Tables S5 and S6)                    | P. S11 |
| RMSE values of the cross-validation test (Table S7 and Figs. S2–S4) | P. S13 |
| Reduced training datasets G1' and G2' (Tables S8 and S9)            | P. S16 |
| Weight diagrams prepared using the reduced datasets (Figs. S5–S9)   | P. S18 |

## Methods

**Preparation of datasets.** The training and test datasets were prepared using the data in our previous works and were summarized in Tables S1–S6, S8, and S9.<sup>48,49</sup> The training data for compounds **19**, **25**, **36**, **37**, **41**, **46**, **49**, **50**, **53**, and **54** were collected in the present work as follows.

The specific capacity of compounds **19**, **25**, **36**, **37**, **41**, **46**, **49**, **50**, **53**, and **54** was measured using three-electrode setup in a twin-beaker cell. The mixture of these active material (30 wt%), acetylene black conductive carbon (60 wt %), and poly(vinylidene fluoride) (PVDF) binder (10 wt%) was prepared with a trace amount of *N*-methyl-2-pyrrolidone (NMP, Junsei Chemical, 99%) and then pasted on a copper mesh as a current collector. After evaporation of NMP, ca. 2 mg of the paste was loaded as the working electrode. The reference and counter electrodes were both metallic lithium. The electrolyte solution was ethylene carbonate (EC) and diethyl carbonate (DEC) (1/1 by volume) containing 1 mol dm<sup>-3</sup> lithium perchlorate (LiClO<sub>4</sub>). Galvanostatic charge-discharge measurement was performed using a chronopotentiometry (Hokuto Denko, HJ1001SD8) with a cut-off voltage 0.01–3.0 V vs. Li/Li<sup>+</sup> at 100 mA g<sup>-1</sup>. The capacity was corrected to subtract the capacity of the conductive carbon (See Fig. S1). The explanatory variables for these compounds were calculated by density functional theory (DFT) using Gaussian 16 under B3LYP functional and 6–311G basis set ( $x_n$ , with the note *a* in Table 1) and Hansen Solubility Parameters in Practice (HSPiP, version 5.0.03) ( $x_n$ , with the note *b* in Table 1).

**Machine learning.** The descriptors of the model G3 were extracted by ES-LiR.<sup>10–14,53</sup> ES-LiR calculates the prediction accuracy of all the possible models based on the error by cross-validation for all 2<sup>*N*</sup> combinations of variables, such as { $x_1$  only}, { $x_1, x_2$ }, { $x_1, x_3$ }, { $x_1, x_4$ }, ..., { $x_1, x_2, x_3$ }, { $x_1, x_2, x_4$ }, ... { $x_1, x_2, \dots, x_n$ }.<sup>53</sup> This exhaustive construction of the models was implemented in Python (ver. 3.7.6) and then the results are summarized in the weight diagram. In ES-BMA, we considered the uncertainty for all 2<sup>*N*</sup> combinations of variables and introduced a method of quantitatively evaluating the confidence level of feature selection using a weighted average of the model posterior probabilities, which is called BMA.<sup>S1</sup> This method can evaluate the confidence level of feature selection and quantify the importance evaluation of features, which has been a qualitative one when using the weight diagram of the exhaustive search method. The summation over all combinations of indicator vectors can be calculated using the result of the exhaustive search, which is called as ES-BMA.<sup>55</sup> When this scheme is applied to the extraction of descriptors, we estimate the probability that *i* th variable ( $i = 1, 2, \dots, n$ ) is included in the descriptors by marginalizing over all combinations of variables including the *i* th variable.<sup>55</sup> The code used in the present work is available at <https://github.com/okada-lab/exhbma>. LASSO was performed by leave-one-out cross validation. When the reduced datasets were prepared, the data was randomly subtracted.

## Additional Reference

S1. A. E. Raftery, D. Madigan and J. A. Hoeting, *J. Am. Stat. Assoc.*, 1997, **92**, 179.

**Molecular structures of 1–54 for training data**

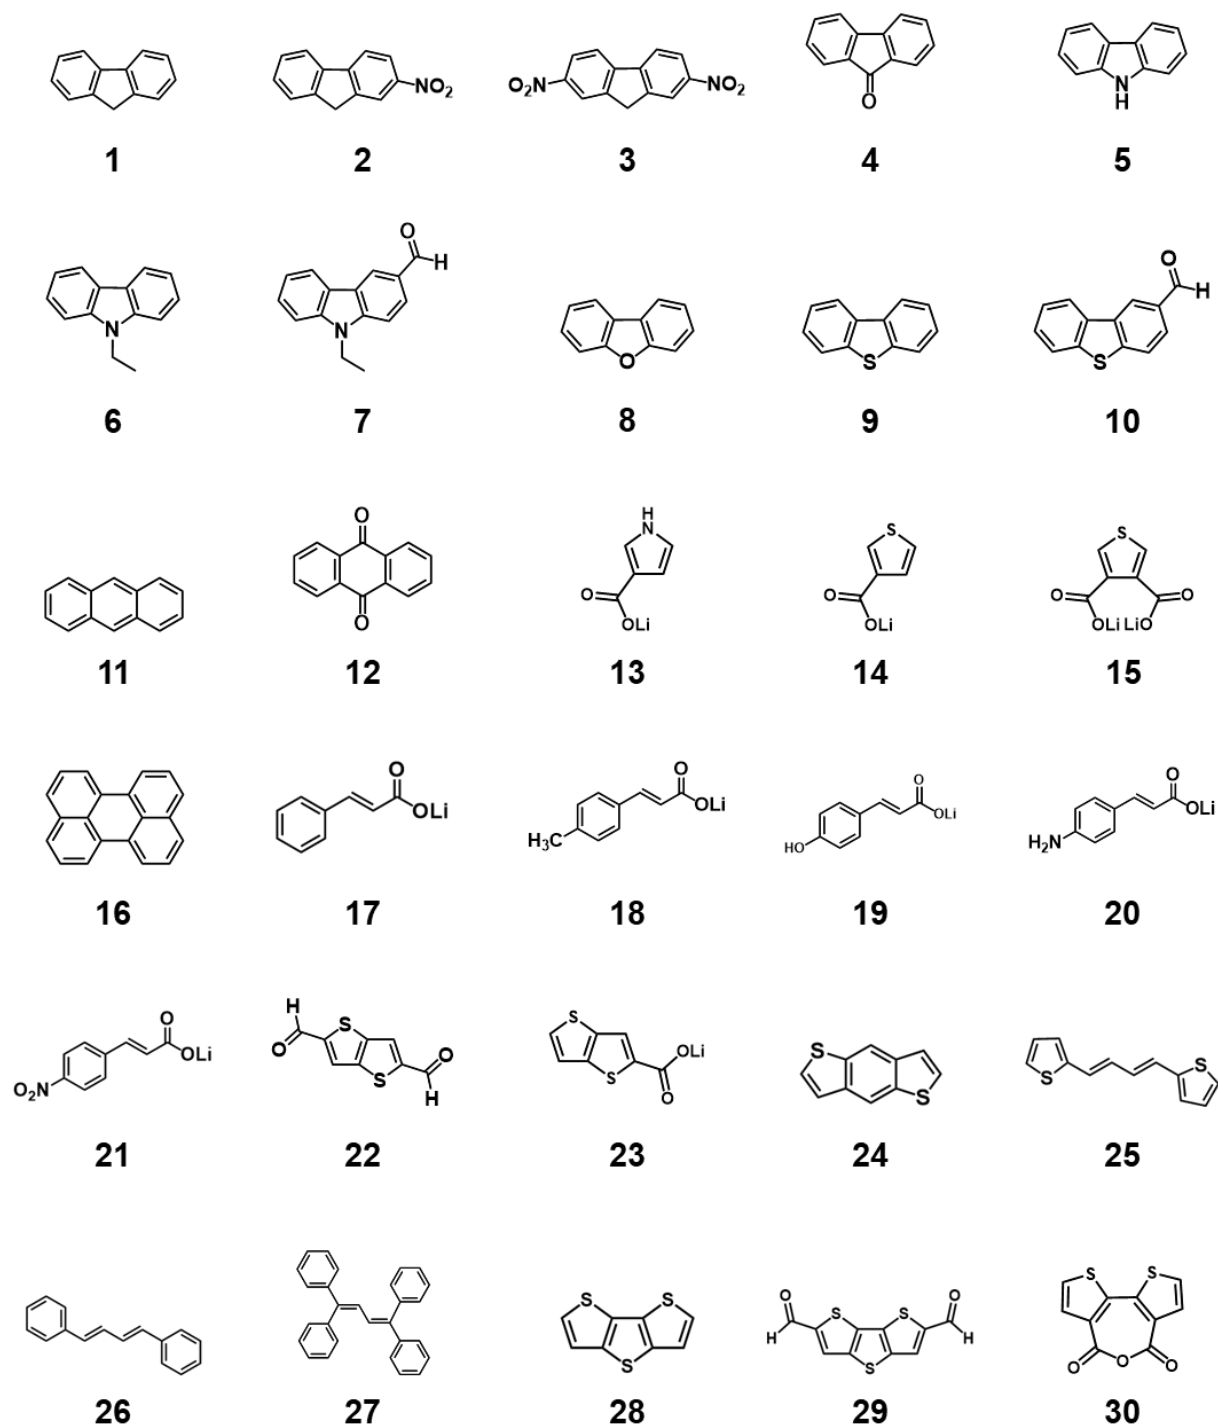

**Scheme S1.** Molecular structures of compounds 1–54 for the training.

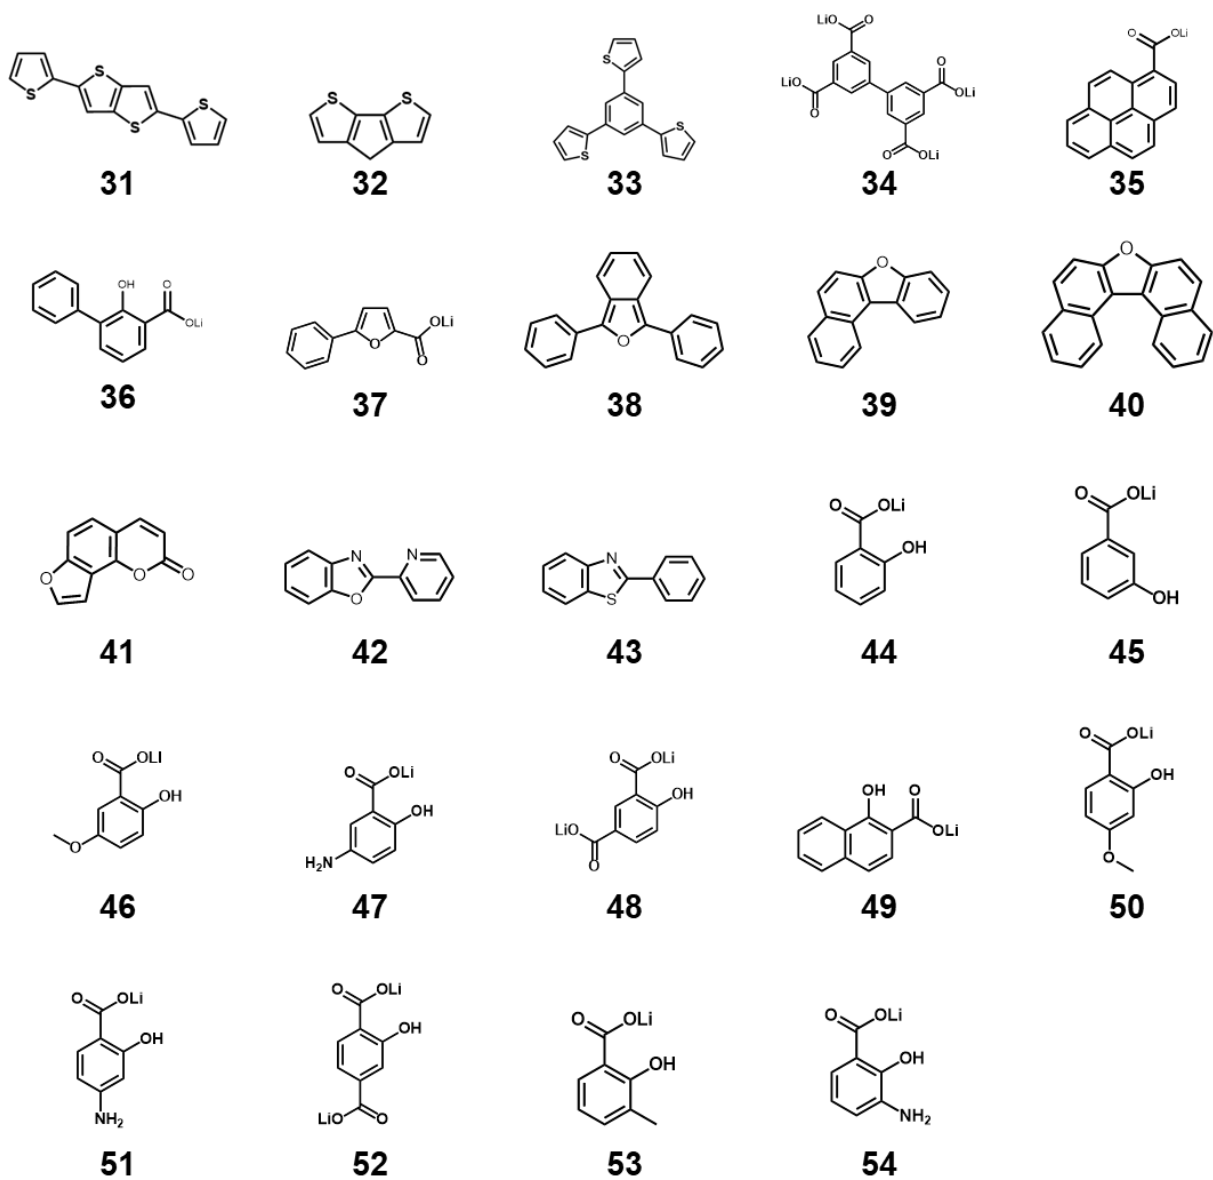

**Scheme S1** (continued). Molecular structures of compounds **1–54** for the training.

The reported specific capacity was summarized in Table 1.

## Molecular structures of A–M for test data

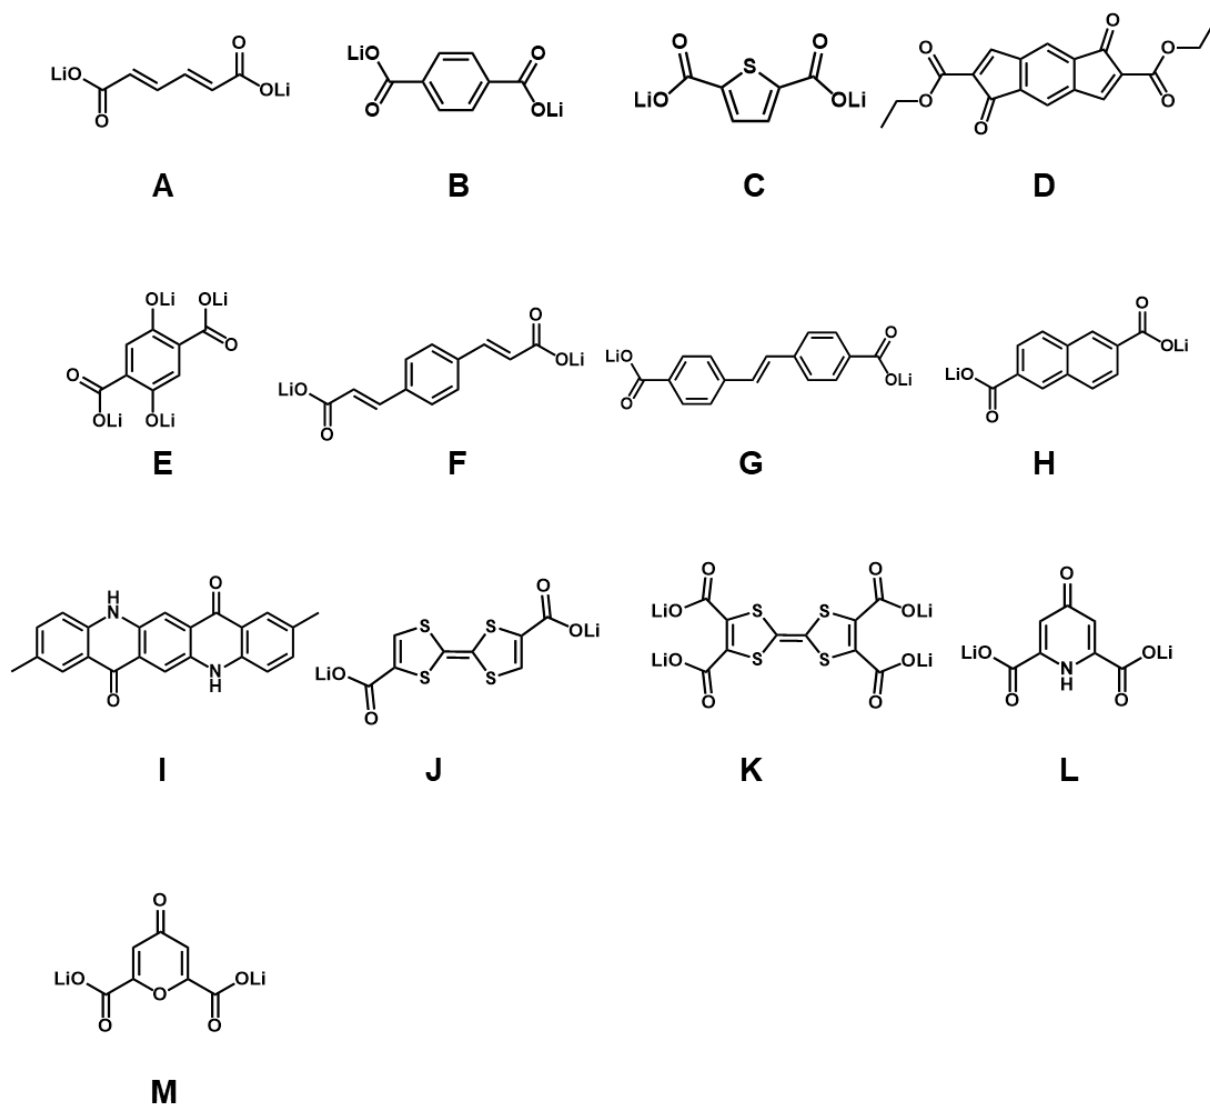

**Scheme S2.** Molecular structures of compounds **A–M** for the test.

The reported specific capacity and literature number were summarized in Table 3.<sup>21–29</sup>

## Additional data based on the charge-discharge measurement

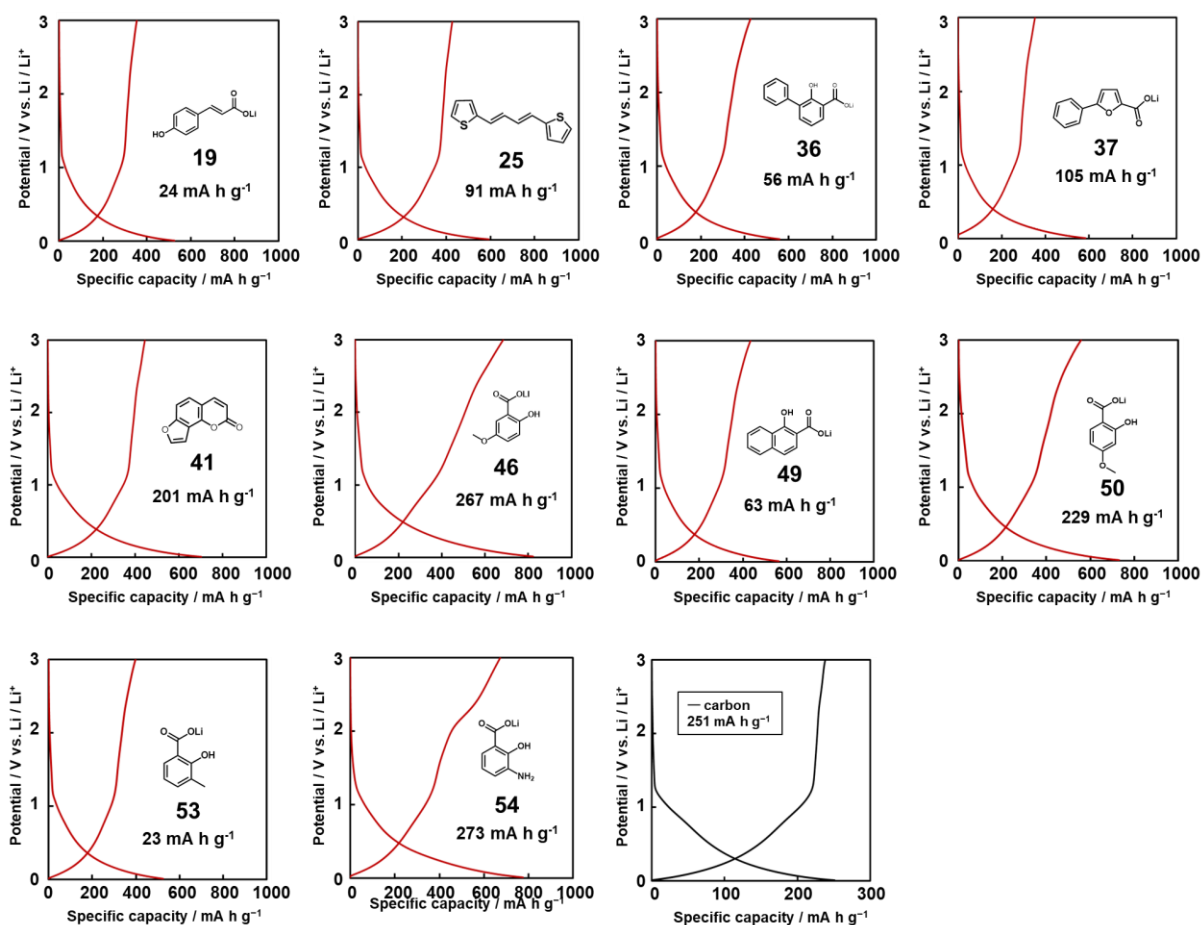

**Fig. S1.** Charge-discharge curves of the compounds **19**, **25**, **36**, **37**, **41**, **46**, **49**, **50**, **53**, and **54**.

The measured specific capacity was summarized in Table 1: 24 mA h g<sup>-1</sup> (**19**), 91 mA h g<sup>-1</sup> (**25**), 56 mA h g<sup>-1</sup> (**36**), 105 mA h g<sup>-1</sup> (**37**), 201 mA h g<sup>-1</sup> (**41**), 267 mA h g<sup>-1</sup> (**46**), 63 mA h g<sup>-1</sup> (**49**), 229 mA h g<sup>-1</sup> (**50**), 23 mA h g<sup>-1</sup> (**53**), and 273 mA h g<sup>-1</sup> (**54**).

The measured discharge capacity of the charge-discharge curve includes the capacity originating from conductive carbon. The corrected net capacity was estimated with the subtraction of the capacity originating from the conductive carbon using (eqn. S1),<sup>49</sup> the corrected actual specific capacity is  $C$  mA h g<sup>-1</sup>, the measured specific capacity at 100 mA g<sup>-1</sup> is  $C_{\text{meas}}$  mA h g<sup>-1</sup>, the weight of the active material is  $W_a$  mg, the specific capacity of the conductive carbon at 50 mA g<sup>-1</sup> is  $C_{\text{AB}}$  mA h g<sup>-1</sup>, and weight of the conductive carbon is  $W_{\text{CB}}$  mg. As the weight ratio of the active material, AB, and binder was 3:6:1 for the high-throughput measurement, the specific capacity of the active material and conductive carbon was measured at 100 and 50 mA g<sup>-1</sup>, respectively.

$$C = (C_{\text{meas}} \times W_a - C_{\text{AB}} \times W_{\text{AB}}) / W_a \quad \dots \text{(eqn. S1)}$$

## Training and test datasets G1

**Table S1.** Training dataset G1.

| compounds | x1     | x2     | x3     | x4     | x5     | x6     | x7     | x8     | x9     | x10    | x11    | x12    | x13    | x14    | x15    | x16    | x17      | x19 | x21 | x22 | x23 | x24    | x25   | x26 | y   |
|-----------|--------|--------|--------|--------|--------|--------|--------|--------|--------|--------|--------|--------|--------|--------|--------|--------|----------|-----|-----|-----|-----|--------|-------|-----|-----|
| 1         | -0.962 | -0.469 | 0.0933 | 0.9331 | 1.3639 | 0.4931 | 1.055  | 1.8948 | 2.3255 | 0.5619 | 0.8398 | 1.4017 | 0.4308 | 1.2705 | 1.8325 | 166.22 | 161.241  | 0   | 12  | 10  | 2   | 1.4303 | 15.76 | 115 | 0   |
| 2         | -3.015 | -1.256 | -1.063 | -0.517 | 0.5363 | 1.7582 | 1.9514 | 2.4972 | 3.5509 | 0.1932 | 0.5459 | 0.7391 | 1.0536 | 1.5995 | 1.7927 | 211.22 | 126.8889 | 0   | 12  | 12  | 4   | 5.8514 | 11.36 | 155 | 0   |
| 3         | -3.68  | -3.09  | -1.714 | -1.371 | -1.132 | 0.59   | 1.9658 | 2.3084 | 2.5473 | 1.3758 | 0.3426 | 1.7184 | 0.2389 | 0.5815 | 1.9574 | 256.22 | 104.6034 | 0   | 12  | 13  | 5   | 10.987 | 12    | 295 | 0   |
| 4         | -2.627 | -1.31  | -0.365 | 0.4724 | 1.061  | 1.3171 | 2.2616 | 3.0994 | 3.688  | 0.9445 | 0.8379 | 1.7824 | 0.5886 | 1.4265 | 2.371  | 180.21 | 148.7236 | 0   | 12  | 10  | 3   | 4.3025 | 10.46 | 84  | 0   |
| 5         | -0.903 | -0.012 | 0.6071 | 0.9859 | 1.04   | 0.8904 | 1.5097 | 1.8885 | 1.9427 | 0.6193 | 0.3788 | 0.9981 | 0.0542 | 0.4329 | 1.0523 | 167.21 | 160.2864 | 0   | 12  | 10  | 2   | 0.9149 | 10.78 | 245 | 0   |
| 6         | -0.855 | 0.04   | 0.6085 | 0.9296 | 1.0466 | 0.8947 | 1.4632 | 1.7843 | 1.9013 | 0.5685 | 0.3211 | 0.8896 | 0.117  | 0.4381 | 1.0066 | 195.27 | 137.2535 | 0   | 12  | 12  | 1   | 0.8547 | 9.83  | 68  | 19  |
| 7         | -1.668 | -1.189 | -0.058 | 0.6378 | 0.6806 | 0.4784 | 1.6093 | 2.3054 | 2.3481 | 1.1309 | 0.6961 | 1.827  | 0.0427 | 0.7388 | 1.8697 | 223.28 | 120.0353 | 0   | 12  | 13  | 3   | 2.9149 | 16.08 | 90  | 732 |
| 8         | -1.226 | -0.271 | -0.005 | 0.6694 | 1.2096 | 0.9549 | 1.221  | 1.8953 | 2.4355 | 0.2661 | 0.6743 | 0.9404 | 0.5402 | 1.2145 | 1.4806 | 168.2  | 159.3429 | 0   | 12  | 9   | 3   | 1.5018 | 12.35 | 83  | 126 |
| 9         | -1.259 | -0.408 | -0.328 | 0.0773 | 0.6558 | 0.8509 | 0.9309 | 1.3364 | 1.9149 | 0.08   | 0.4055 | 0.4855 | 0.5785 | 0.984  | 1.064  | 184.26 | 145.4547 | 0   | 12  | 11  | 3   | 1.9955 | 13.45 | 99  | 0   |
| 10        | -2.14  | -1.582 | -0.615 | -0.214 | 0.0634 | 0.5584 | 1.5252 | 1.9266 | 2.2039 | 0.9668 | 0.4014 | 1.3682 | 0.2773 | 0.6787 | 1.6455 | 212.27 | 126.2613 | 0   | 12  | 12  | 4   | 4.5518 | 16.83 | 107 | 478 |
| 11        | -1.874 | -0.526 | -0.048 | 0.8705 | 1.3244 | 1.3484 | 1.8265 | 2.7449 | 3.1988 | 0.4781 | 0.9184 | 1.3965 | 0.4539 | 1.3723 | 1.8504 | 178.23 | 150.3758 | 0   | 14  | 12  | 3   | 2.4483 | 14.76 | 218 | 0   |
| 12        | -3.255 | -1.955 | -0.941 | -0.642 | 1.0496 | 1.2994 | 2.3138 | 2.6124 | 4.3041 | 1.0145 | 0.2985 | 1.313  | 1.6918 | 1.9903 | 3.0047 | 208.22 | 128.7171 | 0   | 12  | 11  | 4   | 6.7927 | 9.87  | 284 | 0   |
| 13        | -0.864 | -0.314 | 0.7056 | 0.8724 | 0.9277 | 0.55   | 1.5696 | 1.7364 | 1.7916 | 1.0196 | 0.1668 | 1.1864 | 0.0552 | 0.222  | 1.2417 | 117.03 | 229.0138 | 1   | 5   | 10  | 2   | 1.178  | 10.27 | 148 | 84  |
| 14        | -1.193 | -1.172 | 0.0032 | 0.5404 | 0.5959 | 0.0212 | 1.1964 | 1.7337 | 1.7892 | 1.1752 | 0.5373 | 1.7125 | 0.0555 | 0.5928 | 1.768  | 134.08 | 199.8917 | 1   | 5   | 12  | 2   | 2.3653 | 9.25  | 138 | 135 |
| 15        | -1.886 | -1.841 | -0.615 | -0.566 | -0.165 | 0.0441 | 1.2708 | 1.3192 | 1.7203 | 1.2267 | 0.0484 | 1.2752 | 0.4011 | 0.4495 | 1.6763 | 184.02 | 145.6444 | 2   | 6   | 17  | 5   | 5.0731 | 9.35  | 232 | 178 |
| 16        | -2.151 | -0.7   | -0.395 | -0.164 | 1.122  | 1.4507 | 1.7563 | 1.9867 | 3.2731 | 0.3056 | 0.2305 | 0.5361 | 1.2863 | 1.5168 | 1.8224 | 252.32 | 106.2202 | 0   | 20  | 14  | 4   | 3.4108 | 16.41 | 279 | 0   |

**Table S2.** Test dataset G1.

| compounds | x23 | x25      | x26 | y    |
|-----------|-----|----------|-----|------|
| A         | 4   | 10.15234 | 290 | 549  |
| B         | 3   | 7.875278 | 300 | 851  |
| C         | 4   | 9.35254  | 359 | 1143 |
| E         | 3   | 9.763708 | 339 | 254  |
| F         | 5   | 10.83421 | 300 | 178  |
| G         | 6   | 9.089554 | 400 | 222  |
| H         | 5   | 6.760917 | 192 | 176  |
| L         | 5   | 11.53213 | 267 | 242  |
| M         | 4   | 11.09369 | 257 | 230  |



## Training and test datasets G2

**Table S3. Training dataset G2.**

| compounds | x1       | x2       | x3       | x4       | x5       | x16    | x18      | x19 | x21 | x22 | x23 | x24      | x25   | x26 | x27 | x28      | x29    | x31   | x32  | x33   | x34 | x35 | x36      | y    |
|-----------|----------|----------|----------|----------|----------|--------|----------|-----|-----|-----|-----|----------|-------|-----|-----|----------|--------|-------|------|-------|-----|-----|----------|------|
| 7         | -1.66755 | -1.18916 | -0.05823 | 0.637849 | 0.680572 | 223.28 | 120.0353 | 0   | 12  | 13  | 3   | 2.914949 | 16.08 | 90  | 0   | 6.473428 | -0.843 | 20.5  | 0.1  | 6     | 1   | 0   | 0.117647 | 0    |
| 8         | -1.2259  | -0.27103 | -0.0049  | 0.669415 | 1.209573 | 168.2  | 159.3429 | 0   | 12  | 9   | 3   | 1.50183  | 12.35 | 83  | 0   | 1.180898 | -0.522 | 20.69 | 3.4  | 4.2   | 0   | 1   | 0.076923 | 221  |
| 10        | -2.1405  | -1.58211 | -0.61526 | -0.21389 | 0.063404 | 212.27 | 126.2613 | 0   | 12  | 12  | 4   | 4.551751 | 16.83 | 107 | 1   | 2.729268 | -0.358 | 20.1  | 3.9  | 4     | 0   | 0   | 0.133333 | 28   |
| 14        | -1.19325 | -1.17202 | 0.003157 | 0.54043  | 0.595943 | 134.08 | 199.8917 | 1   | 5   | 12  | 2   | 2.365267 | 9.25  | 138 | 1   | 3.728548 | -0.587 | 19.9  | 9.8  | 9.1   | 0   | 0   | 0.375    | 64   |
| 15        | -1.88552 | -1.84144 | -0.61472 | -0.56628 | -0.16518 | 184.02 | 145.6444 | 2   | 6   | 17  | 5   | 5.073133 | 9.35  | 232 | 1   | 6.249363 | -0.581 | 20.4  | 13.7 | 9.6   | 0   | 0   | 0.454545 | 1147 |
| 17        | -1.71354 | -0.99351 | -0.29035 | 0.280284 | 0.762752 | 154.09 | 173.934  | 1   | 9   | 14  | 3   | 2.997402 | 13.77 | 135 | 0   | 2.685945 | -0.58  | 19    | 1.2  | 3     | 0   | 0   | 0.181818 | 355  |
| 20        | -1.2659  | -0.83486 | -0.12572 | 0.532267 | 0.845749 | 169.11 | 158.4855 | 1   | 9   | 13  | 3   | 2.226486 | 12.01 | 170 | 0   | 6.036526 | -0.894 | 20    | 6.9  | 11.1  | 0   | 0   | 0.25     | 105  |
| 21        | -3.25592 | -1.85477 | -1.2444  | -1.04739 | -0.00599 | 199.09 | 134.6199 | 1   | 9   | 15  | 5   | 7.408467 | 8.65  | 285 | 0   | 3.720908 | -0.575 | 19.8  | 9.2  | 7.4   | 0   | 0   | 0.416667 | 0    |
| 22        | -3.44694 | -1.98593 | -0.7516  | -0.41253 | -0.15892 | 196.24 | 136.575  | 0   | 8   | 13  | 5   | 6.755923 | 13.18 | 274 | 2   | 3.949577 | -0.437 | 20.5  | 6.2  | 11.4  | 0   | 0   | 0.333333 | 142  |
| 24        | -1.4553  | -0.43131 | -0.05687 | 0.153204 | 0.393486 | 190.28 | 140.8529 | 0   | 10  | 12  | 3   | 1.943    | 15.09 | 198 | 2   | 0        | -0.462 | 21.5  | 3.2  | 7.9   | 0   | 0   | 0.166667 | 289  |
| 26        | -1.87137 | -0.37906 | -0.24382 | -0.17035 | 1.124672 | 206.29 | 129.9214 | 0   | 16  | 15  | 4   | 2.664599 | 13.17 | 152 | 0   | 0        | -0.211 | 18.9  | 1.7  | 4.2   | 0   | 0   | 0        | 372  |
| 27        | -1.77694 | -0.44247 | -0.39784 | -0.39512 | -0.35893 | 358.48 | 74.76423 | 0   | 28  | 22  | 8   | 3.628    | 13.84 | 201 | 0   | 0.038004 | -0.168 | 19.1  | 1.2  | 3     | 0   | 0   | 0        | 0    |
| 28        | -1.60166 | -0.31402 | -0.24409 | 0.023674 | 0.440553 | 196.3  | 136.5333 | 0   | 8   | 13  | 3   | 2.159769 | 15.11 | 67  | 3   | 0.848    | -0.455 | 21.61 | 4.23 | 9.79  | 0   | 0   | 0.272727 | 490  |
| 29        | -3.43163 | -2.21855 | -0.98995 | -0.82587 | -0.67294 | 252.32 | 106.2202 | 0   | 8   | 16  | 6   | 8.394989 | 18.35 | 270 | 3   | 2.582761 | -0.419 | 21.32 | 0.1  | 11.6  | 0   | 0   | 0.333333 | 0    |
| 30        | -3.29013 | -1.82561 | -1.30016 | -0.71702 | -0.62151 | 236.26 | 113.4406 | 2   | 10  | 15  | 5   | 7.754433 | 12.05 | 263 | 2   | 6.6624   | -0.511 | 21.54 | 11.5 | 10.66 | 0   | 0   | 0.333333 | 178  |
| 31        | -2.40717 | -1.23785 | -0.28926 | -0.21633 | 0.020409 | 296.18 | 90.49052 | 0   | 14  | 19  | 4   | 4.150609 | 15.94 | 254 | 4   | 0.0005   | -0.432 | 21.48 | 3.4  | 10.93 | 0   | 0   | 0.222222 | 0    |
| 32        | -1.42996 | 0.110206 | 0.27157  | 0.924643 | 1.130634 | 178.27 | 150.3421 | 0   | 8   | 12  | 1   | 1.429959 | 14.11 | 73  | 2   | 2.5281   | -0.482 | 20.88 | 3.6  | 8.23  | 0   | 0   | 0.181818 | 729  |
| 33        | -1.71241 | -1.69064 | -1.01362 | 0.29225  | 0.411164 | 324.47 | 82.6008  | 0   | 18  | 21  | 3   | 4.416682 | 14.85 | 159 | 3   | 0.9824   | -0.432 | 20.96 | 3.37 | 9.59  | 0   | 0   | 0.142857 | 45   |
| 34        | -1.48465 | -1.48357 | -1.30125 | -1.29744 | -0.78124 | 353.98 | 75.71468 | 4   | 16  | 32  | 8   | 7.503816 | 9.41  | 400 | 0   | 0.061041 | -0.713 | 21.1  | 12.4 | 6.09  | 0   | 0   | 0.333333 | 512  |
| 35        | -1.97636 | -1.06533 | -0.79811 | -0.21524 | -0.1015  | 252.2  | 106.2707 | 1   | 17  | 17  | 5   | 4.156541 | 13.01 | 274 | 0   | 2.987769 | -0.608 | 21.34 | 5.26 | 5.31  | 0   | 0   | 0.105263 | 109  |
| 38        | -2.04004 | -0.51811 | -0.46232 | -0.29633 | -0.28545 | 270.33 | 99.14358 | 0   | 20  | 16  | 5   | 3.602245 | 12.86 | 134 | 0   | 0.675173 | -0.526 | 18.8  | 2.08 | 2.54  | 0   | 1   | 0.047619 | 0    |
| 39        | -1.59404 | -0.54559 | -0.3249  | -0.06395 | 1.001652 | 218.26 | 122.7961 | 0   | 16  | 13  | 4   | 2.528483 | 14.29 | 47  | 0   | 1.104507 | -0.515 | 20.56 | 2.19 | 4.83  | 0   | 1   | 0.058824 | 277  |
| 40        | -1.70343 | -1.06097 | -0.49715 | -0.36708 | 0.104492 | 268.32 | 99.88627 | 0   | 20  | 15  | 4   | 3.62864  | 15.79 | 161 | 0   | 0.8982   | -0.506 | 20.83 | 0.78 | 5.42  | 0   | 1   | 0.047619 | 0    |
| 42        | -2.04875 | -1.01743 | -0.36273 | -0.07211 | 1.154308 | 196.21 | 136.5959 | 0   | 12  | 11  | 4   | 3.501019 | 9.98  | 109 | 0   | 1.256983 | -0.473 | 20.23 | 7.27 | 4.67  | 2   | 1   | 0.2      | 277  |
| 43        | -1.93772 | -0.52409 | -0.41307 | -0.06585 | -0.05116 | 211.28 | 126.8529 | 0   | 13  | 12  | 5   | 2.991893 | 11.65 | 115 | 1   | 0.360998 | -0.371 | 19.73 | 4.24 | 4.65  | 1   | 0   | 0.133333 | 141  |

**Table S4.** Test dataset G2.

| compounds | x4       | x16    | x22 | x23 | x25      | x35 | y    |
|-----------|----------|--------|-----|-----|----------|-----|------|
| <b>A</b>  | -0.02014 | 153.97 | 16  | 4   | 10.15234 | 0   | 549  |
| <b>B</b>  | 0.061498 | 178    | 16  | 3   | 7.875278 | 0   | 851  |
| <b>C</b>  | -0.11238 | 184.02 | 17  | 4   | 9.35254  | 0   | 1143 |
| <b>D</b>  | -0.77552 | 326.3  | 20  | 5   | 7.017834 | 0   | 125  |
| <b>E</b>  | 0.096056 | 221.86 | 24  | 3   | 9.763708 | 0   | 254  |
| <b>F</b>  | -0.89961 | 230.07 | 21  | 5   | 10.83421 | 0   | 178  |
| <b>G</b>  | -0.89117 | 282.15 | 22  | 6   | 9.089554 | 0   | 222  |
| <b>H</b>  | -0.29007 | 228.06 | 19  | 5   | 6.760917 | 0   | 176  |
| <b>I</b>  | -0.3728  | 340.38 | 18  | 5   | 9.571834 | 0   | 306  |
| <b>J</b>  | -1.17281 | 304.22 | 25  | 6   | 14.86136 | 0   | 253  |
| <b>K</b>  | -1.71731 | 404.1  | 33  | 11  | 17.67852 | 0   | 344  |
| <b>L</b>  | -1.16438 | 194.98 | 17  | 5   | 11.53213 | 0   | 242  |
| <b>M</b>  | -1.23104 | 195.97 | 17  | 4   | 11.09369 | 1   | 230  |

## Training and test datasets G3

**Table S5. Training dataset G3.**

| compounds | x1       | x2       | x3       | x4       | x5       | x16    | x20 | x21 | x23 | x25      | x28      | x29    | x30   | x31   | x32  | x33   | x36      | y    |
|-----------|----------|----------|----------|----------|----------|--------|-----|-----|-----|----------|----------|--------|-------|-------|------|-------|----------|------|
| 8         | -1.22587 | -0.27103 | -0.0049  | 0.6694   | 1.209547 | 168.2  | 0   | 12  | 3   | 12.35    | 1.180898 | -0.522 | 0.178 | 20.1  | 3.9  | 4     | 0.076923 | 221  |
| 10        | -2.14045 | -1.58207 | -0.61525 | -0.21388 | 0.063403 | 212.27 | 1   | 12  | 4   | 16.83    | 2.729268 | -0.358 | 0.416 | 21.2  | 0.1  | 6.2   | 0.133333 | 28   |
| 14        | -1.19322 | -1.09825 | 0.030749 | 0.540418 | 0.595658 | 134.08 | 1   | 5   | 2   | 9.25     | 3.728548 | -0.587 | 0.679 | 19.9  | 9.8  | 9.1   | 0.375    | 64   |
| 15        | -1.88548 | -1.8414  | -0.61471 | -0.56627 | -0.16517 | 184.02 | 2   | 6   | 5   | 9.35     | 12.22115 | -0.736 | 0.716 | 20.4  | 13.7 | 9.6   | 0.454545 | 1147 |
| 17        | -1.7135  | -0.99349 | -0.29035 | 0.280277 | 0.762736 | 154.09 | 1   | 9   | 3   | 10.73965 | 2.225827 | -0.599 | 0.658 | 19    | 4.7  | 6.5   | 0.181818 | 355  |
| 18        | -1.62833 | -0.96083 | -0.24218 | 0.326809 | 0.794573 | 168.12 | 1   | 9   | 3   | 10.6033  | 1.689437 | -0.614 | 0.656 | 19.1  | 4.9  | 6.2   | 0.166667 | 175  |
| 19        | -1.58207 | -0.96247 | -0.43674 | 0.35783  | 0.589943 | 170.09 | 1   | 9   | 3   | 12.6937  | 3.040187 | -0.615 | 0.655 | 19.9  | 7    | 12.5  | 0.25     | 24   |
| 20        | -1.26642 | -0.83457 | -0.12599 | 0.532255 | 0.845458 | 169.11 | 1   | 9   | 5   | 12.01087 | 1.519543 | -0.898 | 0.648 | 20    | 6.9  | 11.1  | 0.25     | 105  |
| 22        | -3.44687 | -1.98589 | -0.75158 | -0.41252 | -0.15891 | 196.24 | 2   | 8   | 5   | 13.17801 | 3.949654 | -0.437 | 0.472 | 20.5  | 6.2  | 11.4  | 0.333333 | 142  |
| 23        | -1.83432 | -1.11403 | -0.07701 | 0.142588 | 0.450621 | 190.16 | 1   | 7   | 4   | 11.7652  | 2.726921 | -0.587 | 0.687 | 20.8  | 8.4  | 10.2  | 0.363636 | 405  |
| 24        | -1.45527 | -0.4313  | -0.05687 | 0.1532   | 0.393477 | 190.28 | 0   | 10  | 3   | 15.08675 | 0.00001  | -0.462 | 0.336 | 21.5  | 3.2  | 7.9   | 0.166667 | 227  |
| 25        | -2.17691 | -0.73444 | 0.349394 | 0.490077 | 0.574977 | 218.33 | 0   | 12  | 2   | 13.52738 | 0.00002  | -0.448 | 0.346 | 20.2  | 3.3  | 8.2   | 0.142857 | 91   |
| 26        | -1.87133 | -0.37905 | -0.24381 | -0.17034 | 1.124647 | 206.29 | 0   | 16  | 4   | 13.16776 | 0.000004 | -0.211 | 0.162 | 18.9  | 1.7  | 4.2   | 0        | 310  |
| 28        | -1.60166 | -0.31402 | -0.24409 | 0.023674 | 0.440553 | 196.3  | 0   | 8   | 3   | 15.09991 | 0.848018 | -0.455 | 0.423 | 21.61 | 4.23 | 9.79  | 0.272727 | 490  |
| 30        | -3.29013 | -1.82561 | -1.30016 | -0.71702 | -0.62151 | 236.26 | 2   | 10  | 5   | 12.09545 | 6.662516 | -0.511 | 0.586 | 21.54 | 11.5 | 10.66 | 0.333333 | 178  |
| 31        | -2.30263 | -1.23785 | -0.28926 | -0.21633 | 0.020409 | 304.46 | 0   | 14  | 4   | 15.94    | 0.000524 | -0.432 | 0.437 | 21.48 | 3.4  | 10.93 | 0.222222 | 30   |
| 32        | -1.42996 | 0.110206 | 0.27157  | 0.874302 | 0.924643 | 178.27 | 0   | 8   | 1   | 14.09257 | 2.528194 | -0.482 | 0.385 | 20.88 | 3.6  | 8.23  | 0.181818 | 798  |
| 34        | -1.48465 | -1.48357 | -1.30125 | -1.29744 | -0.78124 | 353.98 | 4   | 16  | 8   | 9.41     | 0.061017 | -0.713 | 0.704 | 21.1  | 12.4 | 6.09  | 0.333333 | 513  |
| 35        | -1.97636 | -1.06533 | -0.79811 | -0.21524 | -0.1015  | 252.2  | 1   | 17  | 5   | 13.01    | 2.987839 | -0.608 | 0.687 | 21.34 | 5.26 | 5.31  | 0.105263 | 109  |
| 36        | -1.34506 | -1.18043 | -1.05689 | -0.81906 | -0.15973 | 220.15 | 1   | 13  | 5   | 11.04808 | 10.65623 | -0.794 | 0.668 | 20.2  | 7.1  | 8.9   | 0.1875   | 56   |
| 37        | -1.60438 | -1.04002 | -0.35865 | -0.16953 | 0.524908 | 194.11 | 1   | 11  | 4   | 8.210359 | 2.194501 | -0.586 | 0.682 | 18.5  | 6.8  | 4.9   | 0.214286 | 105  |
| 39        | -1.59404 | -0.54559 | -0.3249  | -0.06395 | 1.001652 | 218.26 | 0   | 16  | 4   | 14.29    | 1.104528 | -0.515 | 0.186 | 20.56 | 2.19 | 4.83  | 0.058824 | 277  |
| 41        | -2.2161  | -1.28057 | -0.32681 | 0.742599 | 0.929269 | 186.17 | 1   | 11  | 3   | 8.702873 | 4.317266 | -0.504 | 0.483 | 19.8  | 8.5  | 6.1   | 0.214286 | 201  |
| 42        | -2.04875 | -1.01743 | -0.36273 | -0.07211 | 1.154308 | 196.21 | 0   | 12  | 4   | 9.98     | 1.257007 | -0.473 | 0.312 | 20.23 | 7.27 | 4.67  | 0.2      | 277  |
| 43        | -1.93772 | -0.52409 | -0.41307 | -0.06585 | -0.05116 | 211.28 | 0   | 13  | 5   | 11.65    | 0.361039 | -0.371 | 0.395 | 19.73 | 4.24 | 4.65  | 0.133333 | 141  |
| 44        | -1.36683 | -1.00954 | -0.42967 | -0.27728 | 0.365993 | 144.05 | 1   | 7   | 4   | 10.5423  | 9.8109   | -0.793 | 0.674 | 19.7  | 10.3 | 11.9  | 0.3      | 134  |
| 45        | -1.26125 | -1.11213 | 0.094151 | 0.389395 | 0.60627  | 144.05 | 1   | 7   | 2   | 11.58318 | 4.530913 | -0.623 | 0.677 | 20    | 10   | 12.7  | 0.3      | 15   |
| 46        | -1.3769  | -1.22152 | 0.264767 | 0.383409 | 0.555657 | 174.08 | 1   | 7   | 2   | 11.11126 | 3.105764 | -0.679 | 0.699 | 19.9  | 10.4 | 12.4  | 0.333333 | 267  |
| 47        | -1.19077 | -1.16111 | 0.342864 | 0.591848 | 0.716748 | 159.07 | 1   | 7   | 2   | 15.38636 | 4.241533 | -0.914 | 0.693 | 20.9  | 11.3 | 16.7  | 0.363636 | 73   |
| 48        | -1.29934 | -1.20465 | -0.94805 | -0.83158 | 0.302863 | 194    | 2   | 8   | 4   | 12.04118 | 4.762919 | -0.686 | 0.701 | 20.8  | 13.3 | 12.8  | 0.384615 | 318  |
| 49        | -1.45227 | -0.91512 | -0.80192 | 0.403817 | 0.54314  | 194.11 | 1   | 11  | 3   | 11.15796 | 1.292809 | -0.606 | 0.668 | 19.3  | 6.7  | 10.7  | 0.214286 | 63   |
| 50        | -1.18206 | -1.13227 | 0.156466 | 0.326809 | 0.567902 | 174.08 | 1   | 7   | 2   | 11.11126 | 3.50575  | -0.689 | 0.695 | 19.9  | 10.4 | 12.4  | 0.333333 | 229  |
| 51        | -1.05635 | -0.84083 | 0.413069 | 0.461233 | 0.685999 | 159.07 | 1   | 7   | 2   | 15.38636 | 1.994699 | -0.897 | 0.687 | 20.9  | 11.3 | 16.7  | 0.363636 | 133  |
| 52        | -1.74207 | -1.2071  | -1.00791 | -0.02204 | 0.324632 | 194    | 2   | 8   | 4   | 12.04118 | 1.750611 | -0.679 | 0.699 | 20.8  | 13.3 | 12.8  | 0.384615 | 279  |
| 53        | -1.29173 | -1.23268 | 0.259325 | 0.281638 | 0.524908 | 158.08 | 1   | 7   | 2   | 10.61603 | 4.378474 | -0.683 | 0.698 | 19.7  | 9.1  | 11.3  | 0.272727 | 23   |
| 54        | -1.17744 | -1.10832 | 0.334428 | 0.564364 | 0.747497 | 159.07 | 1   | 7   | 2   | 15.38636 | 3.495252 | -0.911 | 0.695 | 20.9  | 11.3 | 16.7  | 0.363636 | 273  |

**Table S6.** Test dataset G3.

| compounds | x2       | x20 | x25      | x28      | x33  | x36      | y    |
|-----------|----------|-----|----------|----------|------|----------|------|
| A         | -1.01254 | 2   | 10.15234 | 0.002766 | 10.8 | 0.4      | 549  |
| B         | -1.02369 | 2   | 7.875278 | 0.001416 | 7    | 0.333333 | 851  |
| C         | -1.04873 | 2   | 9.35254  | 0.524158 | 9.6  | 0.454545 | 1143 |
| D         | -2.93611 | 4   | 7.017834 | 0.000116 | 7.1  | 0.25     | 125  |
| E         | -1.48411 | 2   | 9.763708 | 0.046831 | 6.9  | 0.428571 | 254  |
| F         | -1.00111 | 2   | 10.83421 | 0.001969 | 8    | 0.333333 | 178  |
| G         | -1.03485 | 2   | 9.089554 | 0.000472 | 4.9  | 0.2      | 222  |
| H         | -1.03458 | 2   | 6.760917 | 0.000102 | 6.2  | 0.25     | 176  |
| I         | -1.36084 | 2   | 9.571834 | 0.069349 | 7.8  | 0.153846 | 306  |
| J         | -1.40384 | 2   | 14.86136 | 0.004566 | 13.7 | 0.5      | 253  |
| K         | -2.11677 | 4   | 17.67852 | 1.351053 | 17.7 | 0.545455 | 344  |
| L         | -1.46642 | 3   | 11.53213 | 6.848167 | 12.6 | 0.461538 | 242  |
| M         | -1.74126 | 3   | 11.09369 | 7.937359 | 12.2 | 0.461538 | 230  |

## RMSE values of the ten-fold cross validation

**Table S7.** RMSE values of the ten-fold cross validation for the models G1–G3 using the merged dataset.

| Model G1 |        |        |        |        |        |        |        |        |        |        |         |        |
|----------|--------|--------|--------|--------|--------|--------|--------|--------|--------|--------|---------|--------|
| Pattern  | (i)    | (ii)   | (iii)  | (iv)   | (v)    | (vi)   | (vii)  | (viii) | (ix)   | (x)    | Average | S. D.  |
| Training | 292.40 | 289.96 | 275.02 | 294.33 | 261.87 | 233.27 | 279.71 | 292.84 | 290.83 | 285.72 | 279.59  | 18.19  |
| Test     | 212.10 | 222.74 | 366.08 | 186.04 | 446.21 | 643.46 | 376.66 | 121.31 | 174.10 | 285.50 | 303.42  | 149.71 |
| Model G2 |        |        |        |        |        |        |        |        |        |        |         |        |
| Pattern  | (i)    | (ii)   | (iii)  | (iv)   | (v)    | (vi)   | (vii)  | (viii) | (ix)   | (x)    | Average | S. D.  |
| Training | 230.54 | 245.18 | 248.91 | 243.80 | 254.48 | 248.47 | 221.71 | 217.03 | 250.15 | 235.91 | 239.62  | 12.13  |
| Test     | 344.23 | 239.21 | 203.84 | 267.10 | 90.48  | 210.87 | 388.88 | 417.86 | 116.88 | 333.43 | 261.28  | 104.53 |
| Model G3 |        |        |        |        |        |        |        |        |        |        |         |        |
| Pattern  | (i)    | (ii)   | (iii)  | (iv)   | (v)    | (vi)   | (vii)  | (viii) | (ix)   | (x)    | Average | S. D.  |
| Training | 205.51 | 193.01 | 203.78 | 198.41 | 188.15 | 205.59 | 181.95 | 203.27 | 199.81 | 163.98 | 194.35  | 12.58  |
| Test     | 94.34  | 233.84 | 129.29 | 200.09 | 281.37 | 95.12  | 323.50 | 133.12 | 214.06 | 480.16 | 218.49  | 113.98 |

The original training and test datasets were mixed and then divided into ten segments. The one segment and remaining nine segments were assigned to the test and training data, respectively. The RMSE values were calculated for the training and test data in each model (Table S7). In addition, the relationship between the estimated and measured values was summarized (Figs. S2–S4). This validation was performed by changing the assignments of the test data for the total ten patterns. Then, the average and standard deviation (S. D.) were calculated.

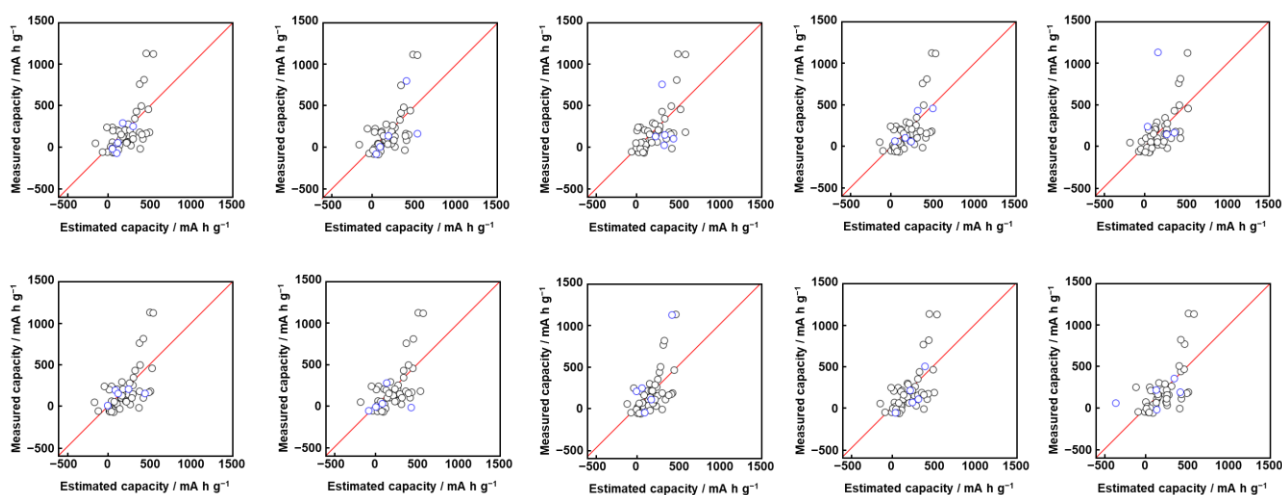

**Fig. S2.** Relationship between the estimated and measured capacity of the ten models prepared for the ten-fold cross validation using the dataset merging the training and test datasets G3.

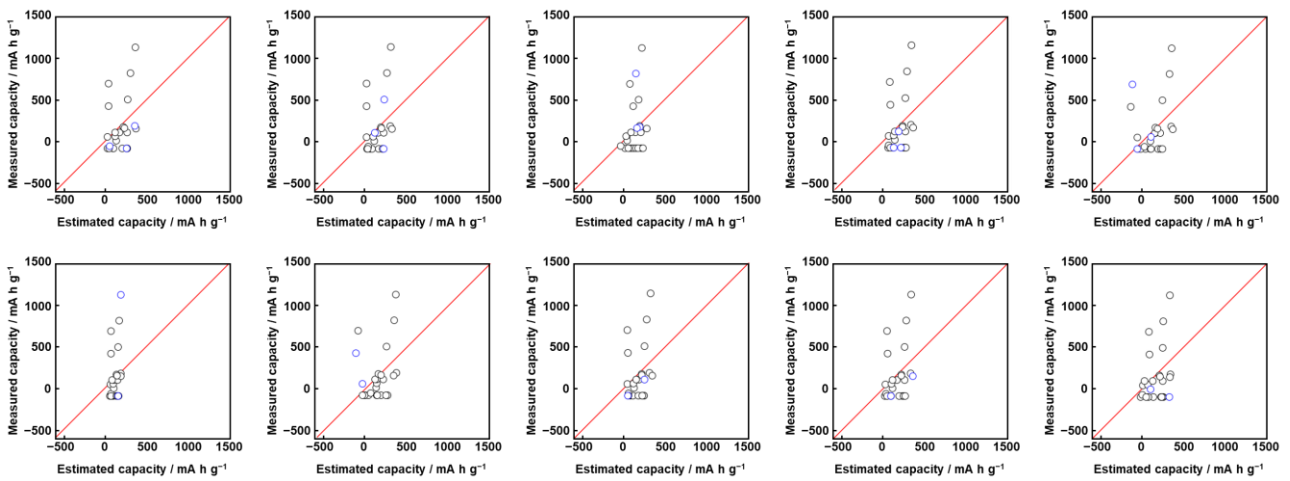

**Fig. S3.** Relationship between the estimated and measured capacity of the ten models prepared for the ten-fold cross validation using the dataset merging the training and test datasets G1.

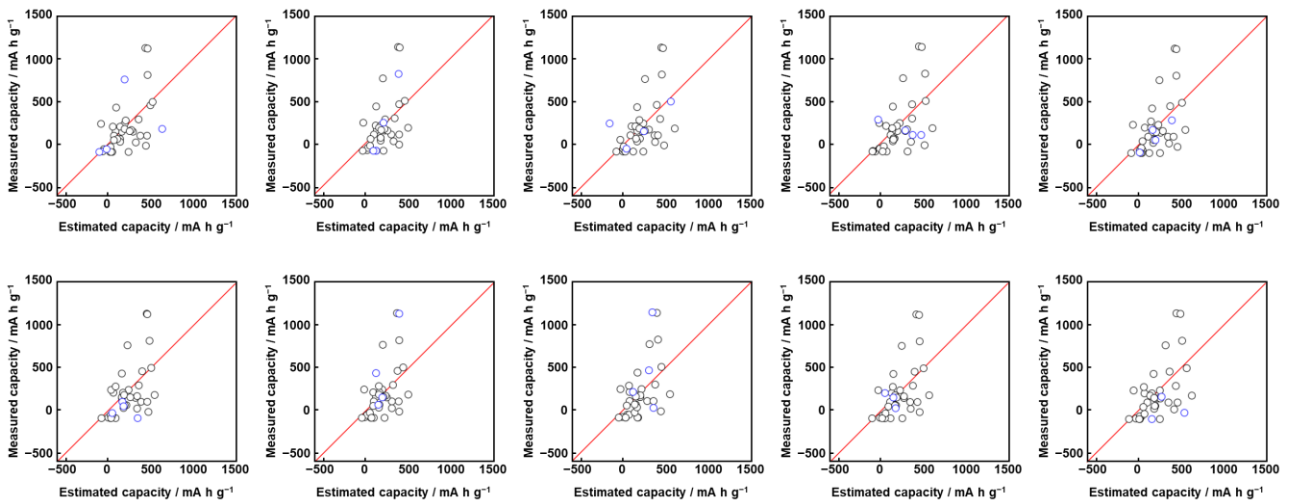

**Fig. S4.** Relationship between the estimated and measured capacity of the ten models prepared for the ten-fold cross validation using the dataset merging the training and test datasets G2.

## Reduced training datasets G1' and G2'

**Table S8.** Training dataset G1'.

| compounds | x1       | x2       | x3       | x4       | x5       | x16    | x20 | x21 | x23 | x25      | x28      | x29    | x30   | x31   | x32  | x33  | x36      | y    |
|-----------|----------|----------|----------|----------|----------|--------|-----|-----|-----|----------|----------|--------|-------|-------|------|------|----------|------|
| 1         | -0.96165 | -0.46858 | 0.093335 | 0.933079 | 1.363835 | 166.22 | 0   | 12  | 2   | 13.24009 | 0.543053 | -0.484 | 0.229 | 20    | 2.8  | 2.8  | 0        | 0    |
| 2         | -3.06373 | -1.45472 | -0.83893 | -0.33062 | 0.540146 | 211.22 | 0   | 12  | 4   | 12.18319 | 4.853086 | -0.516 | 0.296 | 20.9  | 6.7  | 4.5  | 0.1875   | 0    |
| 3         | -3.67953 | -3.08958 | -1.71377 | -1.37118 | -1.13227 | 256.22 | 0   | 12  | 5   | 11.99583 | 1.311101 | -0.562 | 0.289 | 21.5  | 7.3  | 5.3  | 0.315789 | 0    |
| 4         | -2.62699 | -1.30996 | -0.36545 | 0.47239  | 1.060972 | 180.21 | 1   | 12  | 3   | 10.48523 | 3.729398 | -0.322 | 0.266 | 20.7  | 7.6  | 4    | 0.071429 | 0    |
| 5         | -0.9026  | -0.01225 | 0.607086 | 0.985869 | 1.04002  | 167.21 | 0   | 12  | 1   | 10.77544 | 1.636026 | -0.903 | 0.333 | 20.6  | 7.1  | 6    | 0.076923 | 0    |
| 6         | -0.85471 | 0.040001 | 0.608447 | 0.929541 | 1.04655  | 195.27 | 0   | 12  | 1   | 9.831582 | 2.175501 | -0.844 | 0.338 | 20.1  | 7.2  | 4.4  | 0.066667 | 0    |
| 7         | -1.66751 | -1.18914 | -0.05823 | 0.637835 | 0.680557 | 223.28 | 1   | 12  | 3   | 16.08    | 6.473428 | -0.843 | 0.329 | 20.5  | 0.1  | 6    | 0.117647 | 0    |
| 8         | -1.22587 | -0.27103 | -0.0049  | 0.6694   | 1.209547 | 168.2  | 0   | 12  | 3   | 12.35    | 1.180898 | -0.522 | 0.178 | 20.69 | 3.4  | 4.2  | 0.076923 | 221  |
| 9         | -1.25907 | -0.40817 | -0.32817 | 0.07728  | 0.655795 | 196.24 | 0   | 12  | 3   | 13.18    | 3.949577 | -0.437 | 0.472 | 20.5  | 6.2  | 11.4 | 0.333333 | 0    |
| 10        | -2.14045 | -1.58207 | -0.61525 | -0.21388 | 0.063403 | 212.27 | 1   | 12  | 4   | 16.83    | 2.729268 | -0.358 | 0.416 | 20.1  | 3.9  | 4    | 0.133333 | 28   |
| 11        | -1.87432 | -0.526   | -0.04789 | 0.870493 | 1.324379 | 178.23 | 0   | 14  | 3   | 11.49043 | 0.000062 | -0.16  | 0.157 | 20.4  | 1.4  | 4.8  | 0        | 0    |
| 12        | -3.25421 | -1.95459 | -0.9407  | -0.64219 | 1.049544 | 208.22 | 2   | 14  | 4   | 9.012769 | 0.000071 | -0.343 | 0.201 | 20.9  | 11.7 | 4.8  | 0.125    | 0    |
| 13        | -0.86423 | -0.31348 | 0.705319 | 0.872397 | 0.927637 | 117.03 | 1   | 5   | 2   | 10.27132 | 1.432191 | -0.7   | 0.663 | 20.3  | 13.5 | 11.3 | 0.375    | 0    |
| 14        | -1.19322 | -1.09825 | 0.030749 | 0.540418 | 0.595658 | 134.08 | 1   | 5   | 2   | 9.25     | 3.728548 | -0.587 | 0.679 | 19.9  | 9.8  | 9.1  | 0.375    | 64   |
| 15        | -1.88548 | -1.8414  | -0.61471 | -0.56627 | -0.16517 | 184.02 | 2   | 6   | 5   | 9.35     | 6.249363 | -0.581 | 0.668 | 20.4  | 13.7 | 9.6  | 0.454545 | 1147 |
| 16        | -2.15106 | -0.70042 | -0.39484 | -0.21497 | -0.16436 | 252.32 | 0   | 20  | 5   | 16.40579 | 0        | -0.151 | 0.162 | 20.9  | 0.1  | 4.8  | 0        | 0    |

The training dataset was reduced to the 16 compounds used for the construction of the model G1.

**Table S9.** Training dataset G2'.

| compounds | x1       | x2       | x3       | x4       | x5       | x16    | x20 | x21 | x23 | x25      | x28      | x29    | x30   | x31   | x32  | x33   | x36      | y    |
|-----------|----------|----------|----------|----------|----------|--------|-----|-----|-----|----------|----------|--------|-------|-------|------|-------|----------|------|
| 7         | -1.66751 | -1.18914 | -0.05823 | 0.637835 | 0.680557 | 223.28 | 1   | 12  | 3   | 16.08    | 6.473428 | -0.843 | 0.329 | 20.5  | 0.1  | 6     | 0.117647 | 0    |
| 8         | -1.22587 | -0.27103 | -0.0049  | 0.6694   | 1.209547 | 168.2  | 0   | 12  | 3   | 12.35    | 1.180898 | -0.522 | 0.178 | 20.1  | 3.9  | 4     | 0.076923 | 221  |
| 10        | -2.14045 | -1.58207 | -0.61525 | -0.21388 | 0.063403 | 212.27 | 1   | 12  | 4   | 16.83    | 2.729268 | -0.358 | 0.416 | 21.2  | 0.1  | 6.2   | 0.133333 | 28   |
| 14        | -1.19322 | -1.09825 | 0.030749 | 0.540418 | 0.595658 | 134.08 | 1   | 5   | 2   | 9.25     | 3.728548 | -0.587 | 0.679 | 19.9  | 9.8  | 9.1   | 0.375    | 64   |
| 15        | -1.88548 | -1.8414  | -0.61471 | -0.56627 | -0.16517 | 184.02 | 2   | 6   | 5   | 9.35     | 12.22115 | -0.736 | 0.716 | 20.4  | 13.7 | 9.6   | 0.454545 | 1147 |
| 17        | -1.7135  | -0.99349 | -0.29035 | 0.280277 | 0.762736 | 154.09 | 1   | 9   | 3   | 10.73965 | 2.225827 | -0.599 | 0.658 | 19    | 4.7  | 6.5   | 0.181818 | 355  |
| 20        | -1.26642 | -0.83457 | -0.12599 | 0.532255 | 0.845458 | 169.11 | 1   | 9   | 5   | 12.01087 | 1.519543 | -0.898 | 0.648 | 20    | 6.9  | 11.1  | 0.25     | 105  |
| 21        | -3.25612 | -1.855   | -1.24438 | -1.04737 | -0.00599 | 199.09 | 1   | 9   | 5   | 8.654479 | 8.512576 | -0.59  | 0.672 | 19.8  | 9.2  | 7.4   | 0.357143 | 0    |
| 22        | -3.44687 | -1.98589 | -0.75158 | -0.41252 | -0.15891 | 196.24 | 2   | 8   | 5   | 13.17801 | 3.949654 | -0.437 | 0.472 | 20.5  | 6.2  | 11.4  | 0.333333 | 142  |
| 24        | -1.45527 | -0.4313  | -0.05687 | 0.1532   | 0.393477 | 190.28 | 0   | 10  | 3   | 15.08675 | 0.00001  | -0.462 | 0.336 | 21.5  | 3.2  | 7.9   | 0.166667 | 227  |
| 26        | -1.87133 | -0.37905 | -0.24381 | -0.17034 | 1.124647 | 206.29 | 0   | 16  | 4   | 13.16776 | 0.000004 | -0.211 | 0.162 | 18.9  | 1.7  | 4.2   | 0        | 310  |
| 27        | -1.7769  | -0.44246 | -0.39783 | -0.39511 | -0.35892 | 358.48 | 0   | 28  | 8   | 13.84    | 0.038294 | -0.168 | 0.186 | 19.1  | 1.2  | 3     | 0        | 0    |
| 28        | -1.60166 | -0.31402 | -0.24409 | 0.023674 | 0.440553 | 196.3  | 0   | 8   | 3   | 15.09991 | 0.848018 | -0.455 | 0.423 | 21.61 | 4.23 | 9.79  | 0.272727 | 490  |
| 30        | -3.43163 | -2.21855 | -0.98995 | -0.82587 | -0.67294 | 252.32 | 2   | 8   | 6   | 18.37149 | 2.582761 | -0.419 | 0.487 | 21.32 | 0.1  | 11.6  | 0.333333 | 0    |
| 31        | -3.29013 | -1.82561 | -1.30016 | -0.71702 | -0.62151 | 236.26 | 2   | 10  | 5   | 12.09545 | 6.662516 | -0.511 | 0.586 | 21.54 | 11.5 | 10.66 | 0.333333 | 178  |
| 32        | -2.30263 | -1.23785 | -0.28926 | -0.21633 | 0.020409 | 304.46 | 0   | 14  | 4   | 15.94    | 0.000524 | -0.432 | 0.437 | 21.48 | 3.4  | 10.93 | 0.222222 | 30   |
| 33        | -1.42996 | 0.110206 | 0.27157  | 0.874302 | 0.924643 | 178.27 | 0   | 8   | 1   | 14.09257 | 2.528194 | -0.482 | 0.385 | 20.88 | 3.6  | 8.23  | 0.181818 | 798  |
| 36        | -1.71241 | -1.69064 | -1.01362 | 0.29225  | 0.411164 | 324.47 | 0   | 18  | 3   | 14.85    | 0.9824   | -0.582 | 0.384 | 20.96 | 3.37 | 9.59  | 0.142857 | 55   |
| 37        | -1.48465 | -1.48357 | -1.30125 | -1.29744 | -0.78124 | 353.98 | 4   | 16  | 8   | 9.41     | 0.061017 | -0.713 | 0.704 | 21.1  | 12.4 | 6.09  | 0.333333 | 513  |
| 39        | -1.97636 | -1.06533 | -0.79811 | -0.21524 | -0.1015  | 252.2  | 1   | 17  | 5   | 13.01    | 2.987839 | -0.608 | 0.687 | 21.34 | 5.26 | 5.31  | 0.105263 | 109  |
| 43        | -2.04004 | -0.51811 | -0.46232 | -0.29633 | -0.28545 | 270.33 | 0   | 20  | 5   | 12.86    | 0.675154 | -0.526 | 0.187 | 18.8  | 2.08 | 2.54  | 0.047619 | 0    |
| 44        | -1.59404 | -0.54559 | -0.3249  | -0.06395 | 1.001652 | 218.26 | 0   | 16  | 4   | 14.29    | 1.104528 | -0.515 | 0.186 | 20.56 | 2.19 | 4.83  | 0.058824 | 277  |
| 45        | -1.70343 | -1.06097 | -0.49715 | -0.36708 | 0.104492 | 268.32 | 0   | 20  | 4   | 15.79    | 0.898265 | -0.506 | 0.197 | 20.83 | 0.78 | 5.42  | 0.047619 | 0    |
| 48        | -2.04875 | -1.01743 | -0.36273 | -0.07211 | 1.154308 | 196.21 | 0   | 12  | 4   | 9.98     | 1.257007 | -0.473 | 0.312 | 20.23 | 7.27 | 4.67  | 0.2      | 277  |
| 49        | -1.93772 | -0.52409 | -0.41307 | -0.06585 | -0.05116 | 211.28 | 0   | 13  | 5   | 11.65    | 0.361039 | -0.371 | 0.395 | 19.73 | 4.24 | 4.65  | 0.133333 | 141  |

The training dataset was reduced to the 25 compounds used for the construction of the model G2.



## Weight diagrams prepared using the reduced datasets

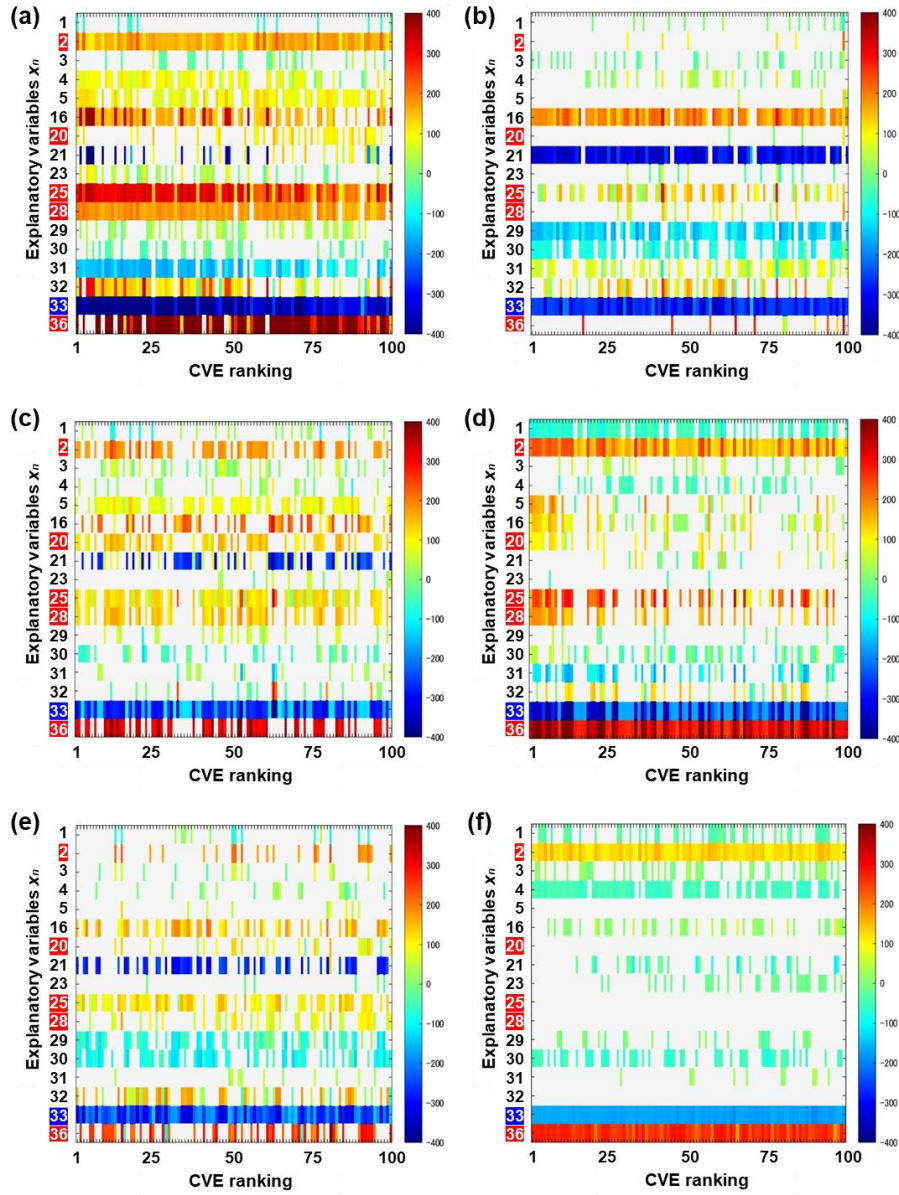

**Fig. S5.** Weight diagrams of the reduced datasets containing 35  $y$  prepared in random six patterns.

The extractable  $x_n$  and its number  $N_x$ : (a)  $x_n$  ( $n = 2, 25, 28, 33, 36$ ),  $N_x = 5$ . (b)  $x_n$  ( $n = 25, 33$ ),  $N_x = 2$ . (c)  $x_n$  ( $n = 2, 20, 25, 28, 33, 36$ ),  $N_x = 6$ . (d)  $x_n$  ( $n = 2, 25, 28, 33, 36$ ),  $N_x = 5$ . (e)  $x_n$  ( $n = 2, 25, 33, 36$ ),  $N_x = 4$ . (f)  $x_n$  ( $n = 2, 33, 36$ ),  $N_x = 3$ . The results are summarized in Table 4.

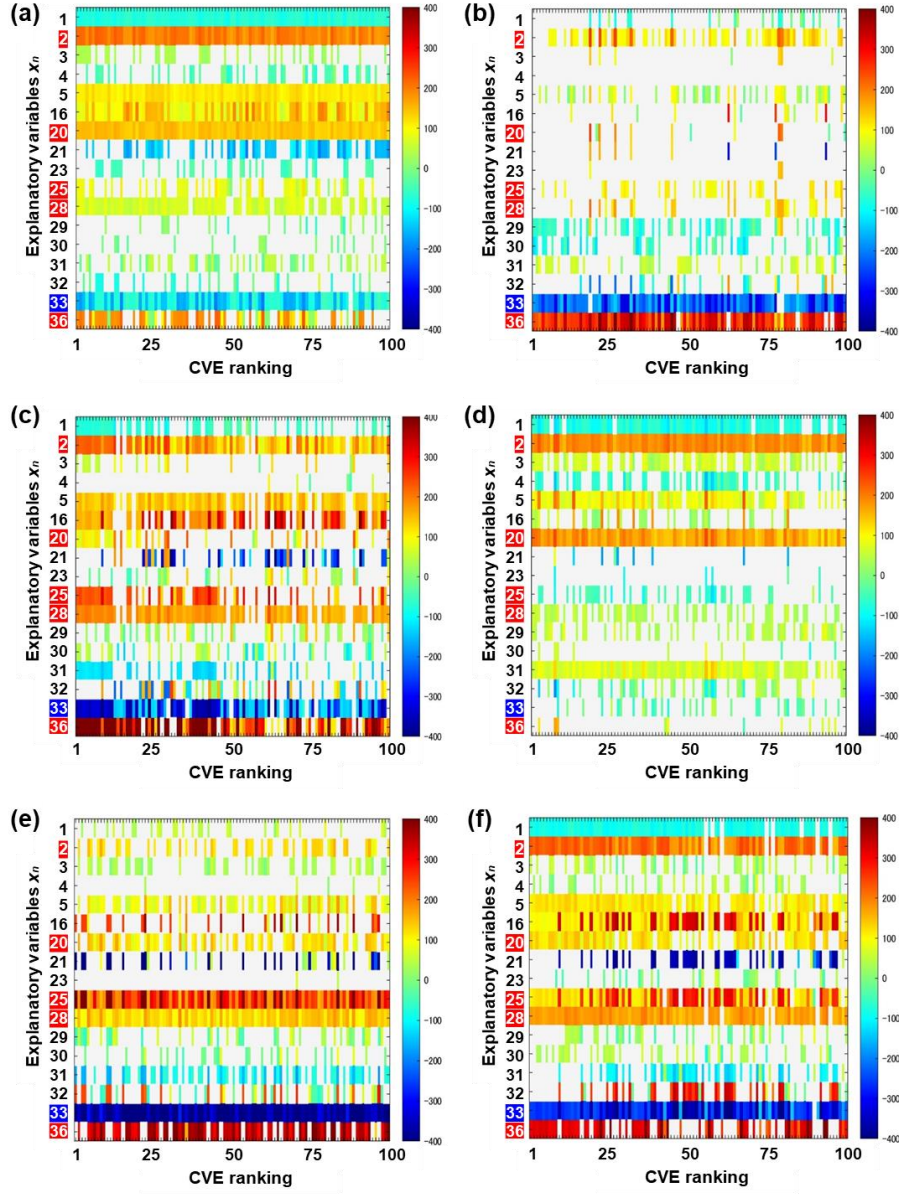

**Fig. S6.** Weight diagrams of the reduced datasets containing 34  $y$  prepared in random six patterns.

The extractable  $x_n$  and its number  $N_x$ : (a)  $x_n$  ( $n = 2, 20, 28, 33, 36$ ),  $N_x = 5$ . (b)  $x_n$  ( $n = 2, 33, 36$ ),  $N_x = 3$ . (c)  $x_n$  ( $n = 2, 25, 28, 33, 36$ ),  $N_x = 5$ . (d)  $x_n$  ( $n = 2, 20, 25, 28$ ),  $N_x = 4$ . (e)  $x_n$  ( $n = 2, 20, 25, 28, 33, 36$ ),  $N_x = 6$ . (f)  $x_n$  ( $n = 2, 20, 25, 28, 33, 36$ ),  $N_x = 6$ . The results are summarized in Table 4.

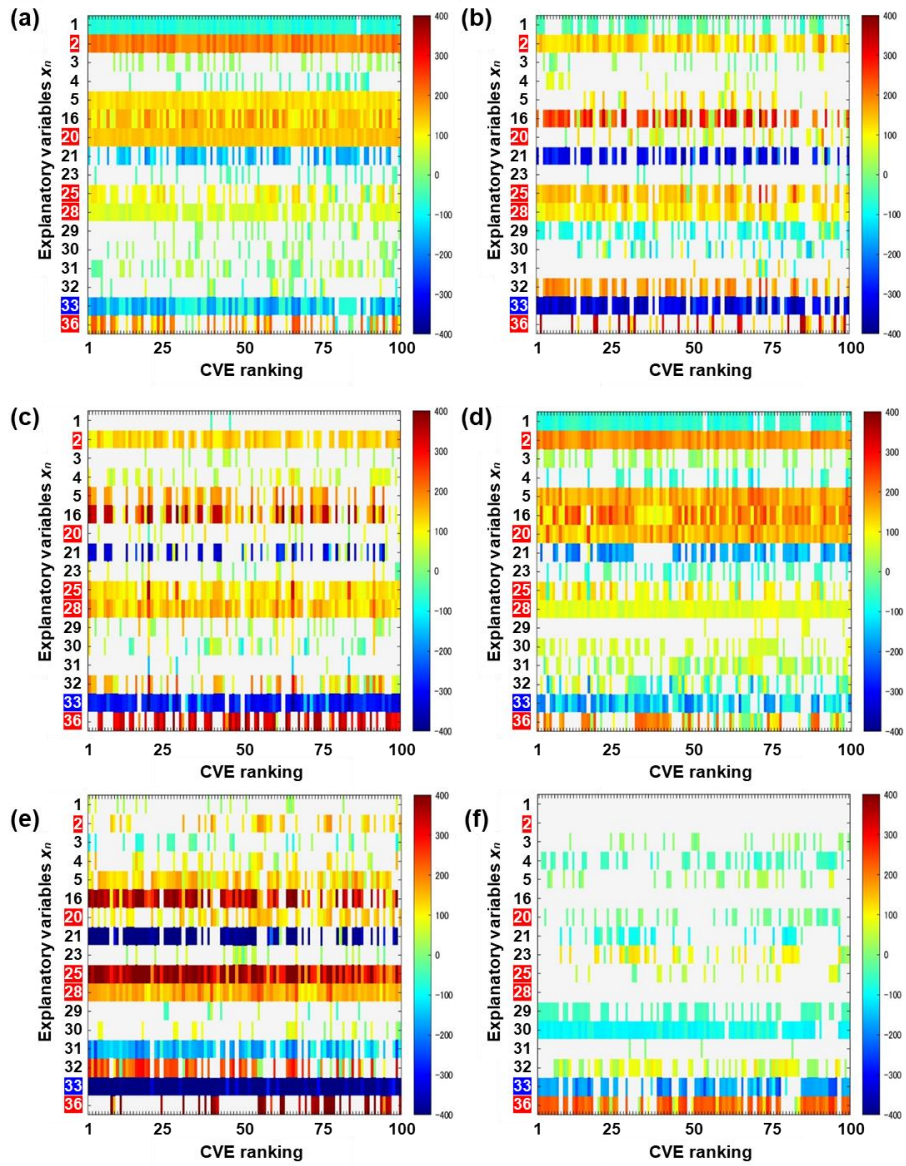

**Fig. S7.** Weight diagrams of the reduced datasets containing 33  $y$  prepared in random six patterns.

The extractable  $x_n$  and its number  $N_x$ : (a)  $x_n$  ( $n = 2, 20, 28, 33, 36$ ),  $N_x = 5$ . (b)  $x_n$  ( $n = 2, 25, 28, 33$ ),  $N_x = 4$ . (c)  $x_n$  ( $n = 2, 25, 28, 33, 36$ ),  $N_x = 5$ . (d)  $x_n$  ( $n = 2, 20, 28, 33, 36$ ),  $N_x = 5$ . (e)  $x_n$  ( $n = 20, 25, 28, 33$ ),  $N_x = 4$ . (f)  $x_n$  ( $n = 33, 36$ ),  $N_x = 2$ . The results are summarized in Table 4.



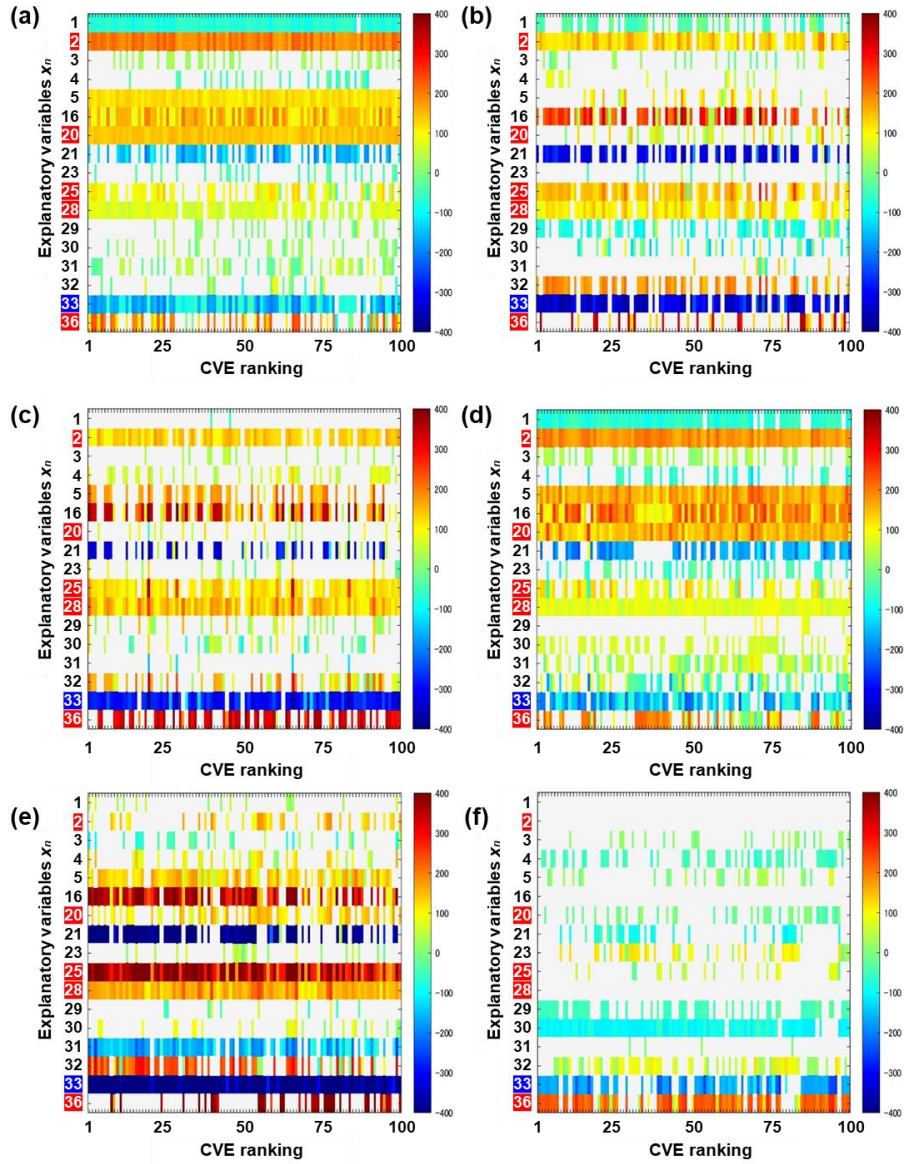

**Fig. S8.** Weight diagrams of the reduced datasets containing 30  $y$  prepared in random six patterns.

The extractable  $x_n$  and its number  $N_x$ : (a)  $x_n$  ( $n = 2, 20, 28, 33$ ),  $N_x = 4$ . (b)  $x_n$  ( $n = 25, 33$ ),  $N_x = 2$ . (c)  $x_n$  ( $n = 2, 25, 28, 33, 36$ ),  $N_x = 5$ . (d)  $x_n$  ( $n = 2, 20, 25, 28, 33$ ),  $N_x = 5$ . (e)  $x_n$  ( $n = 20, 25, 28, 33$ ),  $N_x = 4$ . (f)  $x_n$  ( $n = 33$ ),  $N_x = 1$ . The results are summarized in Table 4.

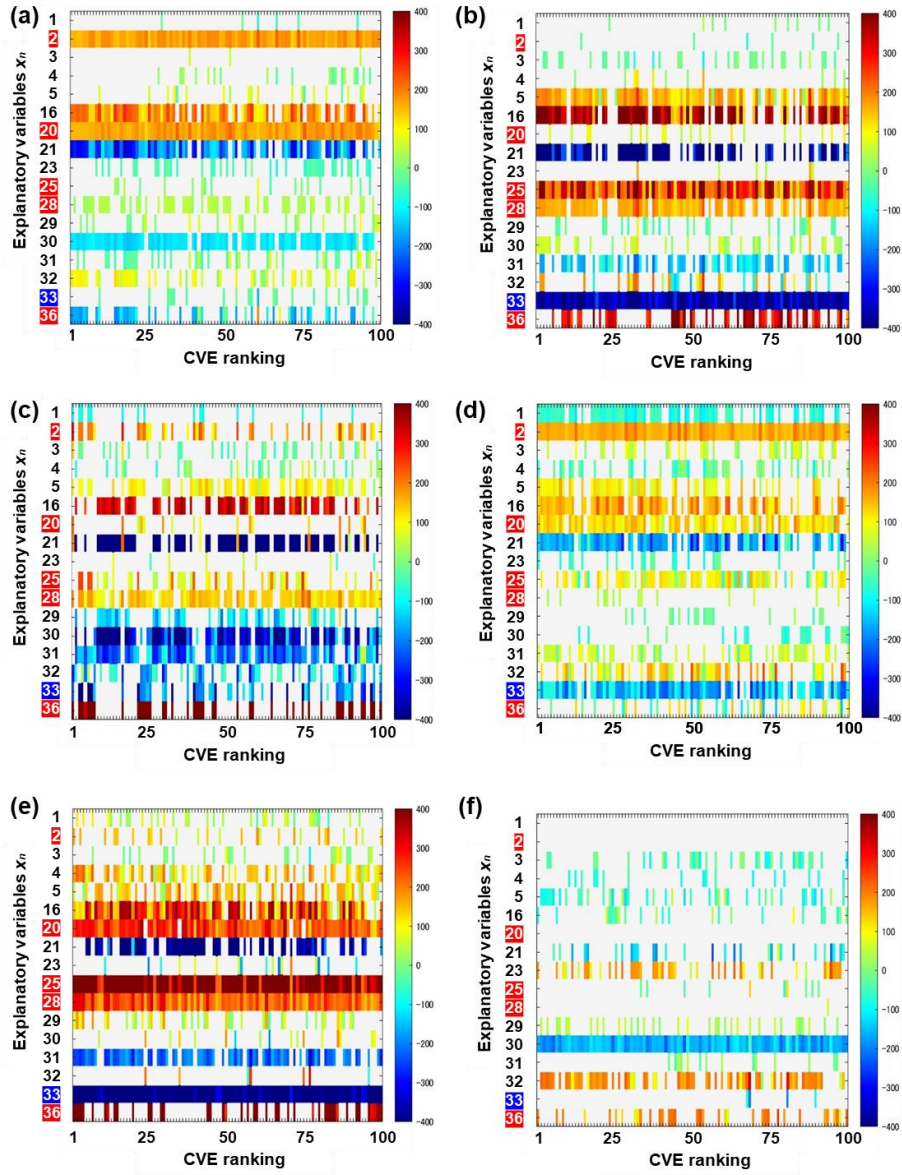

**Fig. S9.** Weight diagrams of the reduced datasets containing 27  $y$  prepared in random six patterns.

The extractable  $x_n$  and its number  $N_x$ : (a)  $x_n$  ( $n = 2, 20, 28$ ),  $N_x = 3$ . (b)  $x_n$  ( $n = 25, 28, 33, 36$ ),  $N_x = 4$ . (c)  $x_n$  ( $n = 2, 28, 33, 36$ ),  $N_x = 4$ . (d)  $x_n$  ( $n = 2, 20, 33$ ),  $N_x = 3$ . (e)  $x_n$  ( $n = 20, 25, 28, 33$ ),  $N_x = 4$ . (f)  $x_n$  (not available),  $N_x = 0$ . The results are summarized in Table 4.
